# Supplementary material for: Facile structure design based on C3N4for mediator-free Z-scheme water splitting under visible light
Source: Royal Society of Chemistry journal article supplement (doi:10.1039/c5cy00379b), 2015-01-01
Supplement: c5cy00379b1.pdf [file c5cy00379b1.pdf]

## Supporting Information

### Facile Structure Design Based on $C_3N_4$ for Mediator-free Z-Scheme Water Splitting under Visible Light

Guixia Zhao,<sup>‡</sup> Xiubing Huang,<sup>‡</sup> Federica Fina, Guan Zhang, and John T.S. Irvine\*

School of Chemistry, University of St Andrews, St Andrews, KY16 9ST, Fife, UK

\* Corresponding author: Prof. John T.S. Irvine, E-mail: jtsi@st-andrews.ac.uk

<sup>‡</sup> These authors contributed equally to this work.

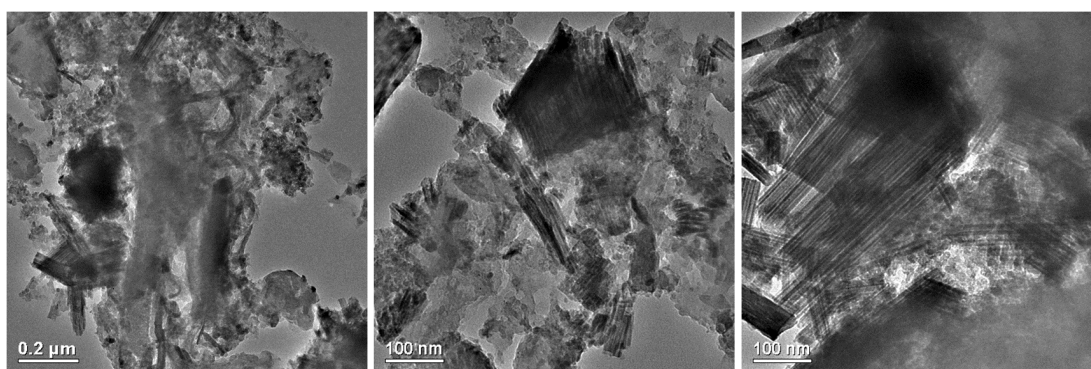

**Figure S1.** TEM images of  $C_3N_4$ -rGO-150- $WO_3$  400-260 loaded with 1 wt% Pt after photocatalytic test.

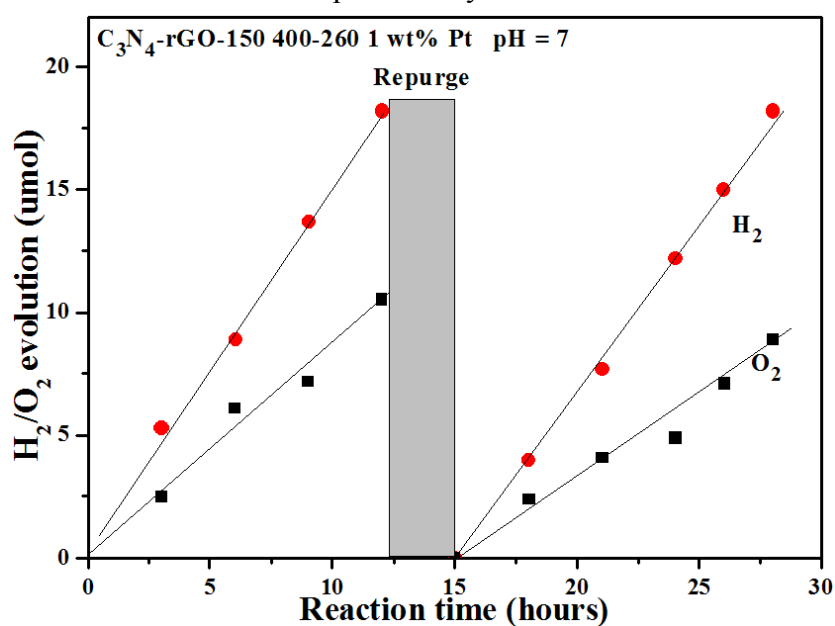

**Figure S2.** Time course of  $H_2/O_2$  evolution for  $C_3N_4$ -rGO-150- $WO_3$  400-260 loaded with 1 wt% Pt under visible light irradiation ( $\lambda > 420$  nm) at pH = 7.

Typical time courses of the  $H_2$  evolution by  $C_3N_4$ -rGO composites with TEOA as sacrificial agent under visible light is shown in Fig. S2. It is obviously to note that the  $C_3N_4$ -rGO-250 and  $C_3N_4$ -rGO-150 showed higher activity than pure  $C_3N_4$  and  $C_3N_4$ -rGO-150 held the best among the five samples. The composite with the highest graphene content showed the lowest performance, even worse than that of pure  $C_3N_4$ . Their contents of graphene in  $C_3N_4$ -rGO composites are shown in Table S1.

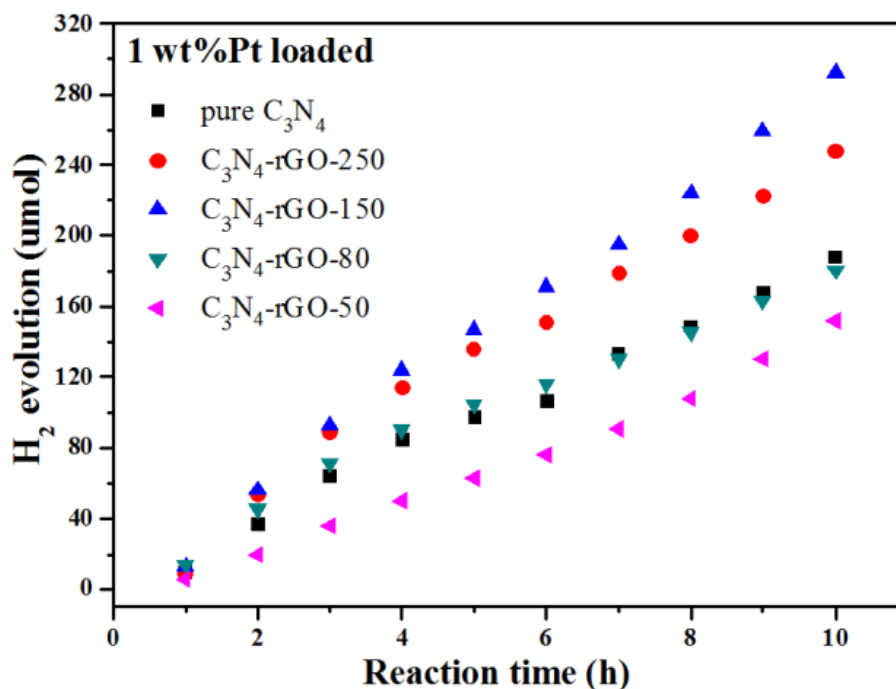

**Figure S3.** Time course of hydrogen evolution of pure  $C_3N_4$  and  $C_3N_4$ -rGO composites loaded with 1 wt% Pt and in the presence of TEOA.

**Table S1:** rGO contents in different  $C_3N_4$ -rGO composites

| Samples           | Initial Reactant mass |          | Element component in mass |       |      | Calculated weight ratio of rGO to $C_3N_4$ (%) |
|-------------------|-----------------------|----------|---------------------------|-------|------|------------------------------------------------|
|                   | Melamine (mg)         | rGO (mg) | C(%)                      | N(%)  | H(%) |                                                |
| Pure $C_3N_4$     | 3000                  | 0        | 34.39                     | 62.76 | 1.67 | <b>0</b>                                       |
| $C_3N_4$ -rGO-250 | 3000                  | 12       | 34.78                     | 63.04 | 1.60 | <b>0.24</b>                                    |
| $C_3N_4$ -rGO-150 | 3000                  | 20       | 34.42                     | 61.01 | 1.39 | <b>1.05</b>                                    |
| $C_3N_4$ -rGO-80  | 3000                  | 37.5     | 35.14                     | 60.73 | 1.48 | <b>1.98</b>                                    |
| $C_3N_4$ -rGO-50  | 3000                  | 60       | 34.26                     | 58.54 | 1.7  | <b>2.41</b>                                    |
| $C_3N_4$ -rGO-30  | 3000                  | 100      | 35.63                     | 56.38 | 1.27 | <b>5.43</b>                                    |

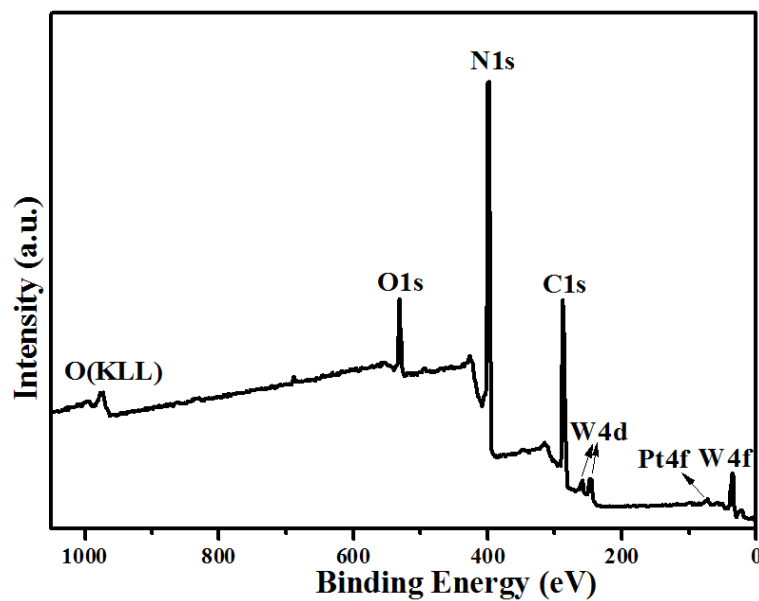

**Figure S4.** XPS survey spectrum of the fresh wet  $\text{C}_3\text{N}_4\text{-rGO-150-WO}_3$  1000-260 loaded with 1 wt% Pt dried in Ar.

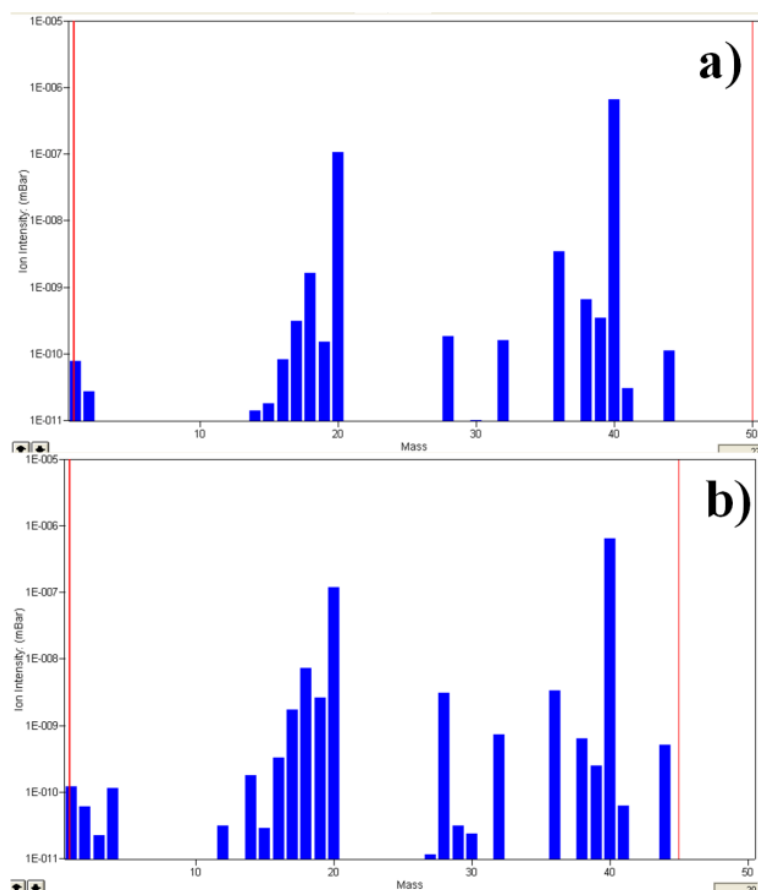

**Figure S5.** a) The mass spectra results of background test without adding photocatalyst; b) mass spectra of gas mixture from the visible-light irradiated reactor with  $\text{D}_2\text{O}$  and  $\text{C}_3\text{N}_4\text{-rGO-150-WO}_3$  1000-260 (loaded with 1 wt% Pt) as reactants.

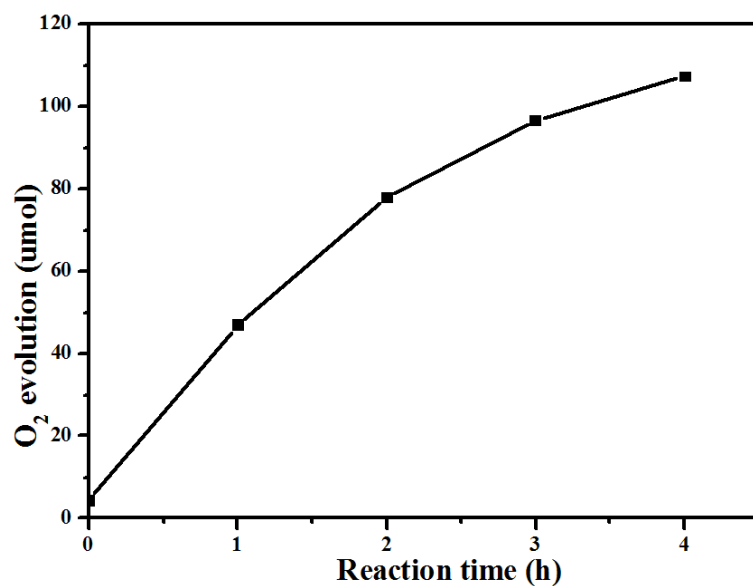

**Figure S6.** Time course of oxygen evolution of 100 mg of  $\text{WO}_3 \cdot 1/3\text{H}_2\text{O}$  powder dispersed into 100 mL of water with 10 mmol/L of  $\text{AgNO}_3$  as an electron acceptor. It is obvious to note that the  $\text{WO}_3 \cdot 1/3\text{H}_2\text{O}$  shows oxygen evolution photocatalytic activity under visible light with  $\text{AgNO}_3$  as an electron acceptor. The slight decrease of oxygen evolution rate can be attributed to the consumption of  $\text{Ag}^+$  and the deposition of Ag nanoparticles onto the surface of  $\text{WO}_3$ .
